# Evidence for a multi-level trophic organization of the human gut microbiome

Tong Wang<sup>1, 2, †</sup>, Akshit Goyal<sup>3, †</sup>, Veronika Dubinkina<sup>2, 4</sup>, Sergei Maslov<sup>2, 4, \*</sup>

**1** Department of Physics, University of Illinois at Urbana-Champaign, IL 61801, USA

**2** Carl R. Woese Institute for Genomic Biology, University of Illinois at Urbana-Champaign, IL 61801, USA

**3** Simons Centre for the Study of Living Machines, National Centre for Biological Sciences, Tata Institute of Fundamental Research, Bengaluru 560 065, India

**4** Department of Bioengineering, University of Illinois at Urbana-Champaign, IL 61801, USA

† These authors contributed equally to this work.

\* Correspondence: [maslov@illinois.edu](mailto:maslov@illinois.edu)

## 1 Abstract

2 The human gut microbiome is a complex ecosystem, in which hundreds of microbial species and  
3 metabolites coexist, in part due to an extensive network of cross-feeding interactions. However,  
4 both the large-scale trophic organization of this ecosystem, and its effects on the underlying  
5 metabolic flow, remain unexplored. Here, using a simplified model, we provide quantitative  
6 support for a multi-level trophic organization of the human gut microbiome, where microbes  
7 consume and secrete metabolites in multiple iterative steps. Using a manually-curated set of  
8 metabolic interactions between microbes, our model suggests about four trophic levels, each  
9 characterized by a high level-to-level metabolic transfer of byproducts. It also quantitatively  
10 predicts the typical metabolic environment of the gut (fecal metabolome) in approximate  
11 agreement with the real data. To understand the consequences of this trophic organization, we  
12 quantify the metabolic flow and biomass distribution, and explore patterns of microbial and  
13 metabolic diversity in different levels. The hierarchical trophic organization suggested by our  
14 model can help mechanistically establish causal links between the abundances of microbes and  
15 metabolites in the human gut.

## 16 Introduction

17 The human gut microbiome is a complex ecosystem with several hundreds of microbial species  
18 [1, 2] consuming, producing and exchanging hundreds of metabolites [3, 4, 5, 6, 7]. With  
19 the advent of high-throughput genomics and metabolomics techniques, it is now possible to  
20 simultaneously measure the levels of individual metabolites (the fecal metabolome), as well as  
21 the abundances of individual microbial species [8]. Quantitatively connecting these levels with  
22 each other, requires knowledge of the relationships between microbes and metabolites in their  
23 shared environment: who produces what, and who consumes what? [9, 10] In recent studies,  
24 information about these relationships for all of the common species and metabolites in the human  
25 gut has been gathered using both manual curation from published studies [6] and automated  
26 genome reconstruction methods [3]. This has laid the foundation for mechanistic models which  
27 would allow one to relate metabolome composition to microbiome composition [11, 12].

28 More generally, the construction of mechanistic models has been hindered by the complexity  
29 of dynamical processes taking place in the human gut, which in addition to cross-feeding and

30 competition, includes differential spatial distribution and species motility, interactions of microbes  
31 with host immune system and bacteriophages, changes in activity of metabolic pathways in  
32 individual species in response to environmental parameters, etc. This complexity can be tackled  
33 on several distinct levels. For 2-3 species it is possible to construct a detailed dynamical model  
34 taking into account the spatial organization and flow of microbes and nutrients within the lower  
35 gut [13, 14], or optimizing the intracellular metabolic flows as well as competition for extracellular  
36 nutrients using dynamic flux balance analysis (dFBA) models [15, 4].

37 For around 10 microbial species, and a comparable number of metabolites, it is possible  
38 to construct a consumer-resource model (CRM) taking into account microbial competition for  
39 nutrients [16], the generation of metabolic byproducts [17], and the different tolerance of species  
40 to various environmental factors like pH [14, 18]. Using the existing experimental data on  
41 consumption and production kinetics of different metabolites, it is possible to fit some (but not  
42 all) of around 80 parameters in such a model [19]. These models are also capable of incorporating  
43 cross-feeding interactions between microbial species, as well as community assembly processes  
44 [19, 20].

45 However, modeling 100s of species and metabolites, typically present in an individual's gut  
46 microbiome, requires thousands of parameters, which cannot be estimated from the current  
47 experimental data. Therefore, any such model must instead resort to a few "global parameters"  
48 that appropriately coarse-grain the relevant ecosystem dynamics. Here, we propose such a  
49 coarse-grained model of the human gut microbiome, hierarchically organized into several distinct  
50 trophic levels. In each level, metabolites are consumed by a subset of microbial species in the  
51 microbiome, and partially converted to microbial biomass. A remainder of these metabolites is  
52 excreted as metabolic byproducts, which then form the next level of metabolites. The metabolites  
53 in this level can then be consumed as nutrients by another subset of microbial species. Our model  
54 needs two global parameters: (1) the fraction of nutrients converted to metabolic byproducts  
55 by any microbial species, and (2) the number of trophic levels into which the ecosystem is  
56 hierarchically organized.

57 While previous studies have suggested that such cross-feeding of metabolic byproducts is  
58 common in the microbiome, the extent to which this ecosystem is hierarchically organized has not  
59 been quantified. Our model suggests that both, the gut microbiome, and its relevant metabolites,  
60 are organized into roughly 4 trophic levels, which interconnect these microbes and metabolites  
61 in quantitative agreement with their experimentally measured levels. We also show that this  
62 model can predict the flow of biomass and metabolites through these trophic levels, quantify  
63 the relative contribution of the observed microbes and metabolites to these levels, and thereby  
64 describe the effective diversity at each level.

## 65 **Model and Results**

### 66 **Multi-level trophic model of the human gut microbiome**

67 Our model aims to approximate the metabolic flow through the intricate cross-feeding network of  
68 microbes in the lower intestine (hereafter, "gut") human individuals (figure 1A). This flow begins  
69 with metabolites entering the gut, which are subsequently consumed and processed by multiple  
70 microbial species. We assume that each microbial species grows by converting a certain fraction  
71 of its metabolic inputs (nutrients) to its biomass and secretes the rest as metabolic byproducts  
72 (figure 1B). We define the byproduct fraction,  $f$ , one of the two key parameters of our model, as  
73 the fraction of nutrients secreted as byproducts. The complementary biomass fraction,  $1 - f$ ,  
74 is the fraction of nutrient inputs converted to microbial biomass. The metabolic byproducts

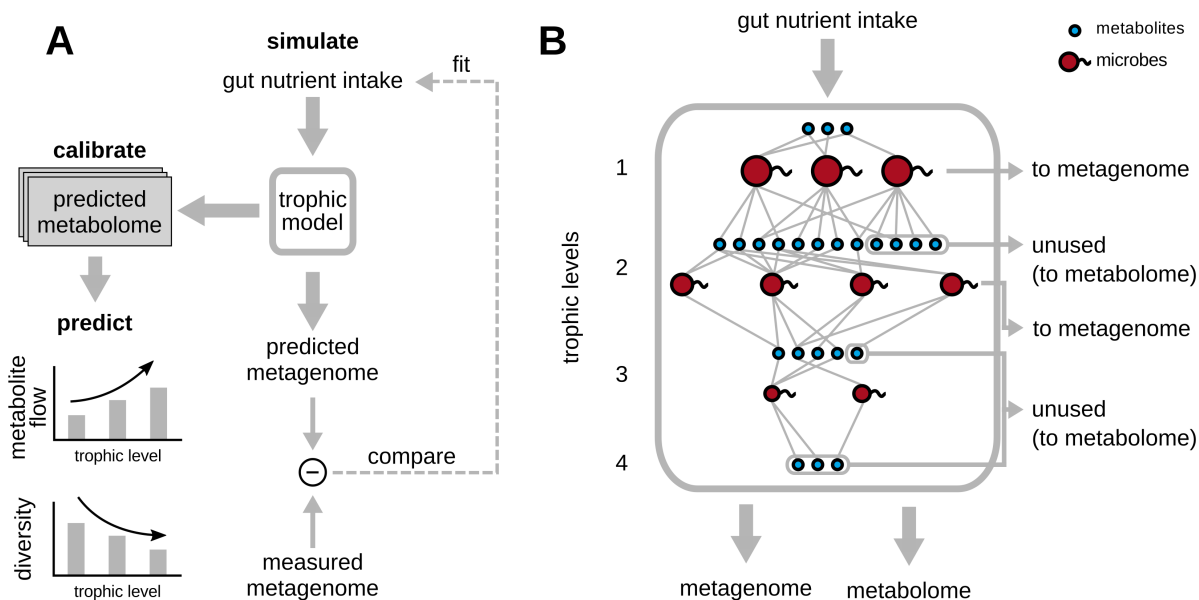

**Figure 1: Overview of the trophic model, its calibration and predictions.** (A) Schematic diagram showing the various steps in the trophic model, which uses fits the gut nutrient intake profile best approximating the measured metagenome, and outputs a predicted metagenome (microbial abundances) and metabolome. The experimentally measured metabolome is used to calibrate the number of trophic levels,  $N_\ell$  and byproduct fraction,  $f$  of the model. (B) “Zoomed-in” view of the trophic model from (A), with different microbial species (red) and metabolites (blue) spread across the four trophic levels suggested by the model. At each level, metabolites are consumed by microbial species, and converted partially to their biomass, while the remainder is secreted as metabolic byproducts, which are nutrients for the next trophic level. Metabolites that are left unconsumed across each level are assumed to eventually exit the gut as part of the fecal metabolome, while the biomass accumulated by each species across all levels contributes to the metagenome.

75 produced from the nutrients entering the gut, can be further consumed by some species in the  
 76 microbiome, in turn generating a set of secondary metabolic byproducts. We call each step of  
 77 this process of metabolite consumption and byproduct generation, a trophic level. Due to factors  
 78 such as limited gut motility, and a finite length of the lower gut, we assume that this process only  
 79 continues for a finite number of levels,  $N_\ell$ , the second key parameter of our model. At the end of  
 80 this process, metabolites left unconsumed after passing through  $N_\ell$  trophic levels are assumed to  
 81 leave the gut as a part of the feces (figure 1B).

82 In order to quantitatively describe all the steps of this process, our model requires the  
 83 following information:

- 84 • The metabolic capabilities of different microbial species in the gut, i.e., which microbes can  
 85 consume which metabolites, and secrete which others. For this, we used a manually curated  
 86 database connecting 567 common human gut microbes to 235 gut-relevant metabolites they  
 87 are capable of either consuming or producing as byproducts [6] (see Methods for details).
- 88 • The nutrient intake to the gut, which is the first set of metabolites that are consumed by  
 89 the microbiome. Since the levels of these metabolites in a given individual are generally  
 90 unknown, we first curated a list of 19 metabolites likely to constitute the bulk of this  
 91 nutrient intake, and subsequently fitted their levels to best describe the observed microbial  
 92 abundances in the gut of each individual (see Methods). We collected such microbial

93 abundance data from various sources, in particular: 380 samples from the large-scale whole-  
94 genome sequencing (WGS) studies of healthy individuals (Human Microbiome Project  
95 (HMP) [1] and the MetaHIT consortium [2, 21]), 41 samples from a recent 16S rRNA study  
96 of 10 year old children in Thailand [22].

97 • The kinetics of nutrient uptake and byproduct release, i.e., the rates we refer to as  $\lambda$ 's,  
98 at which different microbial species obtain and secrete different metabolites in the gut  
99 environment (see Methods for details of how we defined  $\lambda$ 's). Since this information is  
100 unknown for most of our microbes and metabolites, we made some simplifying assumptions.  
101 We assumed that, in a given level, when species consume the same metabolite, they  
102 receive it in proportion to their abundance in the microbiome. When secreting metabolic  
103 byproducts, we assumed equal splitting, such that every metabolite secreted by a given  
104 species was released in the same fraction. However, we later verified that the predictions of  
105 our model was relatively insensitive to the exact values of these parameters, by repeating  
106 our simulations with randomized values of these parameters (see figure S1).

## 107 **Simulating the trophic model**

108 Our model describes the transit of nutrients from the lower gut to the feces of a specific human  
109 individual. As the nutrients transit through the gut, the microbial species in the gut consume,  
110 digest and convert them to microbial biomass and metabolic byproducts. For a specific individual,  
111 our model comprises multiple iterative steps of metabolite consumption by microbes and the  
112 subsequent generation of metabolic byproducts, with each step constituting a trophic level. At  
113 each level, all metabolites produced in the previous level could be consumed by all microbial  
114 species detected in the specific individual's gut. Note that at the first level, these metabolites  
115 were given by the nutrient intake to the gut, as described above. Any metabolite that could be  
116 consumed by multiple microbial species, was split across those species in proportion to their  
117 experimentally measured relative abundances (see Methods for details). Those metabolites that  
118 could not be consumed at any level were assumed to eventually exit the gut, and form part of the  
119 individual's fecal metabolome. Upon metabolite consumption in any trophic level, we assumed  
120 that all microbial species that consumed these metabolites and converted a fraction  $(1 - f)$  of  
121 the total consumed metabolites to their biomass. The remaining fraction,  $f$  (assumed fixed for  
122 all species) was converted to byproducts for the next level. Here, we assumed that each of the  
123 species produced all the byproducts it was capable of in equal amounts. After  $N_\ell$  such iterative  
124 rounds (calibrated separately, see the next section), we assumed that this process ends. We  
125 added up all the biomass accumulated by each microbial species across all trophic levels as their  
126 total biomass, and added up all the unconsumed metabolite levels as the total fecal metabolome.  
127 Finally, we normalized, both the microbial biomass and metabolite amounts separately, to obtain  
128 the relative microbial abundances and relative metabolome profiles, respectively.

## 129 **Calibrating the key parameters of the model**

130 To calibrate the two key parameters of our model,  $f$  and  $N_\ell$ , we used data from the 41 individuals  
131 from a recent 16S rRNA sequencing study of Thai children [22] for which both, 16S rRNA  
132 metagenomic profiles, as well as quantitative levels of 214 metabolites in the fecal metabolome,  
133 were available. We used these data specifically because they had simultaneously measured the  
134 metagenomes and fecal metabolomes with high accuracy, i.e., at the level of individual species and  
135 metabolites, which we required for calibration. In each individual we fitted the nutrient intakes

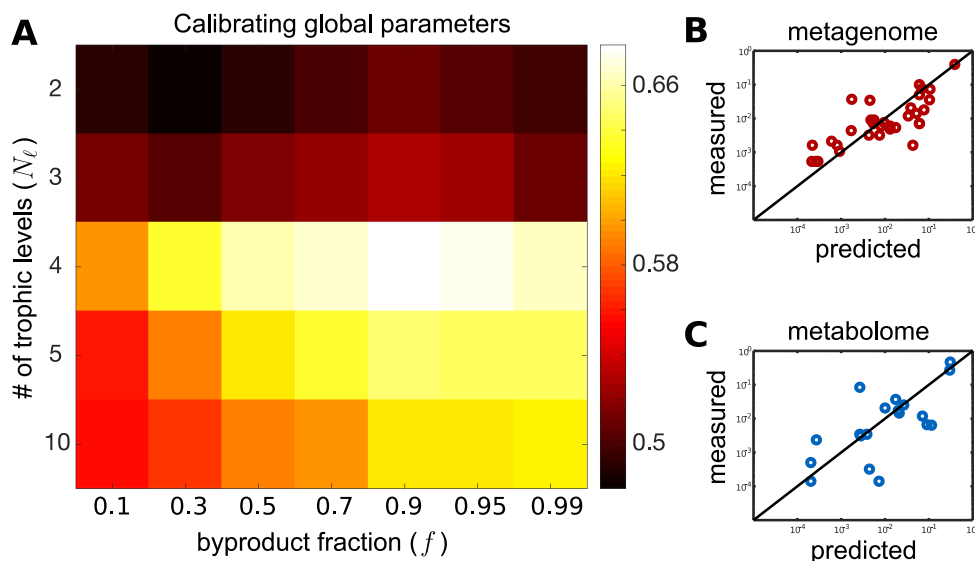

**Figure 2: Calibration of the model.** (A) Heatmap of the Pearson correlation between experimentally measured and predicted metabolomes for different combinations of parameters  $f$  and  $N_\ell$ . The plotted value is the correlation coefficient averaged over 41 individuals in Ref. [22] (B) Comparison between the experimentally observed bacterial abundances in a representative individual (y-axis) and their best fits from our model (x-axis) with  $f = 0.9$  and  $N_\ell = 4$ . (C) Comparison between the experimentally observed fecal metabolome (y-axis) and the predictions of our model (x-axis) with  $f = 0.9$  and  $N_\ell = 4$  in the same individual shown in panel (B) (Pearson correlation coefficient 0.68;  $P$ -value  $< 10^{-5}$ ).

136 of the 19 metabolites to best agree with experimental microbial abundances. A representative  
137 example comparing the predicted and measured bacterial abundances is shown in figure 2B. The  
138 Pearson correlation coefficient for data shown in this plot is 0.94, while in individual participants  
139 it ranged between  $0.81 \pm 0.17$ .

140 We carried out these fits of microbial abundances for each of the 41 individuals studied in  
141 Ref. [22] for a broad range of two parameters of our model - the byproduct fraction  $f$  ranging  
142 between 0.1 and 0.99 and the number of trophic levels  $N_\ell$  between 2 and 10. For each individual  
143 and each pair of parameters  $f$  and  $N_\ell$  we used our model to predict the fecal metabolome  
144 profile. This predicted metabolome was subsequently compared to the experimental data of  
145 Ref. [22] measured in the same individual. Around 19 of our predicted metabolites (variable  
146 across individuals) were actually among the ones experimentally measured in Ref. [22]. We  
147 quantified the quality of our predictions using the Pearson correlation coefficient between the  
148 predicted and experimentally measured metabolomes, and its associated  $P$ -value. The model  
149 with parameters  $f = 0.9$  and  $N_\ell = 4$  best agreed with the experimental metabolome data, among  
150 all the values we tried (Pearson correlation  $0.7 \pm 0.2$ ; median  $P$ -value  $8 \times 10^{-4}$ ; see figure 2A).  
151 To account for the fact that we used two adjustable parameters in our model ( $f$  and  $N_\ell$ , we have  
152 corrected the  $P$ -values appropriately (see Methods for details). We found that even after this  
153 correction the median  $P$ -value  $\sim 10^{-3}$  is well below the commonly used significance threshold  
154 of 0.05. To ensure that our calibration was not sensitive to this specific measure of fit quality,  
155 we also calculated an alternative measure — that of a logarithmic accuracy — which quantifies  
156 the average order-of-magnitude error in our predicted fecal metabolome, when compared with  
157 the experimentally measured one (see Methods for details). We found that the best logarithmic  
158 accuracy was still achieved in a model with  $f = 0.9$  and  $N_\ell = 4$  (the mean error is 0.8 orders  
159 of magnitude; see figure S4). Hence, we used this combination of parameters in all subsequent



160 simulations of our model.

161 An example of the agreement between predicted and experimentally observed fecal metabolome  
162 in a single individual (the same one as in figure 2B) is shown in figure 2C (Pearson correlation  
163 coefficient 0.89; the adjusted  $P$ -value  $< 10^{-6}$ ). Note that, while the agreement between the  
164 experimentally observed and predicted microbial abundances shown in figure 2B is the outcome of  
165 our fitting the levels of 19 intake metabolites, the fecal metabolome is an independent prediction  
166 of our model. It naturally emerges from the trophic organization of the metabolic flow and  
167 agrees well with the experimentally observed metabolome. To test the quality of this independent  
168 prediction, and to show its dependence on metabolic interactions, we repeated our simulations  
169 using a randomly shuffled set of microbial metabolic capabilities (i.e., we independently shuffled  
170 consumption and secretion abilities of individual microbial species; see Methods for details).  
171 Figure S3 shows the model results generated by this shuffled microbial metabolic capabilities. We  
172 found that the model now generated a much worse correlation coefficient, and more importantly, a  
173 non-significant median  $P$ -value 0.05 which did not clear the commonly used threshold of  $P < 0.05$   
174 (for example, the individual in figure 2B–C has Pearson correlation 0.32;  $P$ -value = 0.19; see  
175 figure S3). For all individuals, the Pearson correlation is  $0.44 \pm 0.2$  and the median of their  
176 corresponded  $P$ -value 0.046. Taken together, our simplified model supports the organization of  
177 the human gut microbiome into roughly four trophic levels with byproduct fraction around 0.9.

178 To apply our model to broader, more representative and better-studied samples of the human  
179 gut microbiome, we carried over the results of this calibration to another dataset. This dataset  
180 (discussed in the next section) consisted of a cohort of 380 human individuals from the Human  
181 Microbiome Project (HMP) and the MetaHIT study. We carried over this calibration for three  
182 reasons: (1) the lack of availability of simultaneous metabolome measurements for the latter  
183 dataset; (2) the fact that both datasets are derived from the human gut; and (3) the similarity  
184 in the level of metagenome variability in both datasets.

## 185 Predictions of the multi-level trophic model

### 186 Metabolite and biomass flow through trophic levels

187 With a well-calibrated and tested model we are now in a position to apply it to a broader set  
188 of human microbiome data. To this end we chose data for 380 healthy adult individuals from  
189 several countries (Europe [2], USA [1], and China [21]). For each individual, we used our model  
190 to predict its metabolome (that has not been measured experimentally) and quantified the flow  
191 of nutrients (or metabolic activity) through 4 trophic levels in our model averaged over these  
192 individuals.

193 Figure 3A shows the cascading nature of this flow: metabolites enter the gut as nutrient  
194 intake shown as the leftmost turquoise bar in figure 3A. Roughly, a fraction  $1 - f = 0.1$  of  
195 this nutrient intake is converted into microbial biomass (red bar), while the remaining fraction  
196  $f = 0.9$  is excreted as metabolic byproducts. Some fraction of these metabolic byproducts (blue  
197 bar) cannot be consumed by any of the microbes in individuals microbiome and hence ultimately  
198 it leaves the individual as part of their fecal metabolome. The metabolic byproducts that can be  
199 consumed by the microbiome (turquoise bar) serve as the nutrient intake for microbes in the  
200 next level (i.e., level 3). This scenario repeats itself over the next levels until the level 4, beyond  
201 which we assume all the byproducts enter the fecal metabolome. Note that, even though some of  
202 these byproducts can be consumed by gut microbes, our previous calibration (figure 2A) suggests  
203 that this does not happen. We believe this may be due to the finite time of flow of nutrients  
204 through the gut. Figure 3B shows the normalized contributions of the nutrient intake to microbial

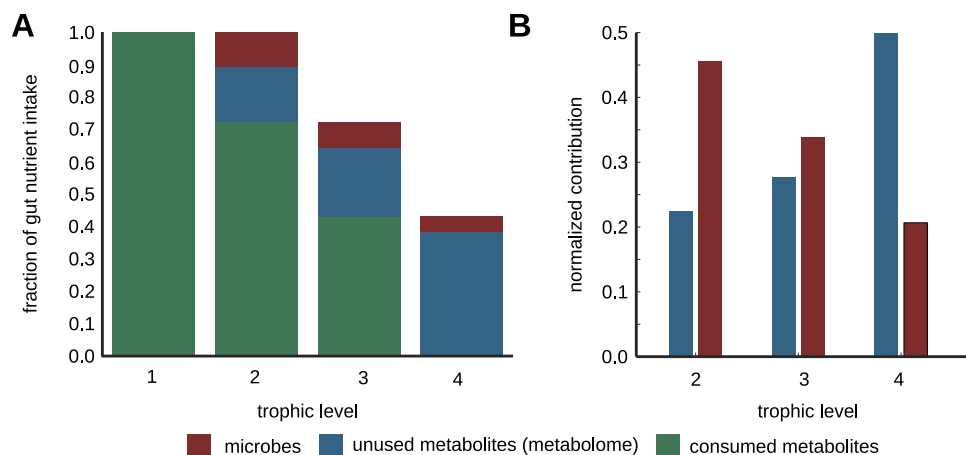

**Figure 3: Metabolite and biomass flow through the levels.** (A) Cascading nature of nutrient flow across trophic levels: nutrient intake to the gut (the leftmost turquoise bar) is gradually converted into microbial biomass (red bars in each level) and metabolic byproducts (turquoise bars in each level). Some fraction of these byproducts (blue bars in each level) cannot be consumed by the microbiome and hence remains further unprocessed until it leaves an individual as their fecal metabolome. The metabolic byproducts of each level (turquoise bars) serve as the nutrient intake for microbes in the next level. The process ends at level 4 where all byproducts remain unconsumed thereby enter the fecal metabolome. (B) Normalized contribution of of the nutrient intake to microbial biomass (red) and fecal metabolome (blue) split across levels 2 to 4. Dashed lines show that consumable metabolites generated at a previous level serve as metabolic inputs to the next level.

205 biomass (red) and fecal metabolome (blue) split across trophic levels. We observe a contrasting  
206 pattern across levels, with the contribution to microbial biomass decreasing along levels, whereas  
207 the fraction of unused metabolites (contribution to the fecal metabolome) increases. It is also  
208 worth noting that the same microbial and metabolic species get contributions from multiple  
209 trophic levels, i.e., the same microbes that consume nutrients and excrete byproducts in earlier  
210 levels can also grow on metabolites generated in later levels. Thus, even though the dominant  
211 contribution to a species' biomass is typically derived from a specific trophic level, species can  
212 grow by consuming metabolites from multiple levels.

### 213 Quantifying diversity across trophic levels

214 The diversity of microbial communities can be separately defined both phylogenetically and  
215 functionally. Phylogenetic diversity counts the number of abundant microbial species inferred  
216 from the metagenomic profile. On the other hand, functional diversity quantifies the variety  
217 of collective metabolic activities of these species, which in our case could be inferred from the  
218 metabolome profile. Our model allows to quantify both types of diversity on a level-by-level  
219 basis. Instead of just calculating the presence or absence of microbial species or metabolites at  
220 each level, we weighed each microbe or metabolite by their relative contribution to the metabolic  
221 activity at that trophic level. At each level, we calculated the effective  $\alpha$ -,  $\beta$ - and  $\gamma$ -diversity,  
222 separately for microbes and metabolites (see Methods for details).

223 Figure 4 shows the effective  $\alpha$ -,  $\beta$ - and  $\gamma$ - diversity for microbes (grouped at the species  
224 and genus levels) and metabolites, averaged over our 380 healthy individuals. The microbes  
225 first appear in the second trophic level feeding off the nutrient intake metabolites in the first  
226 level. We found that the  $\alpha$ -diversity (the average number of abundant entities weighted by their  
227 contribution to each level) systematically increases with the level number for both microbes

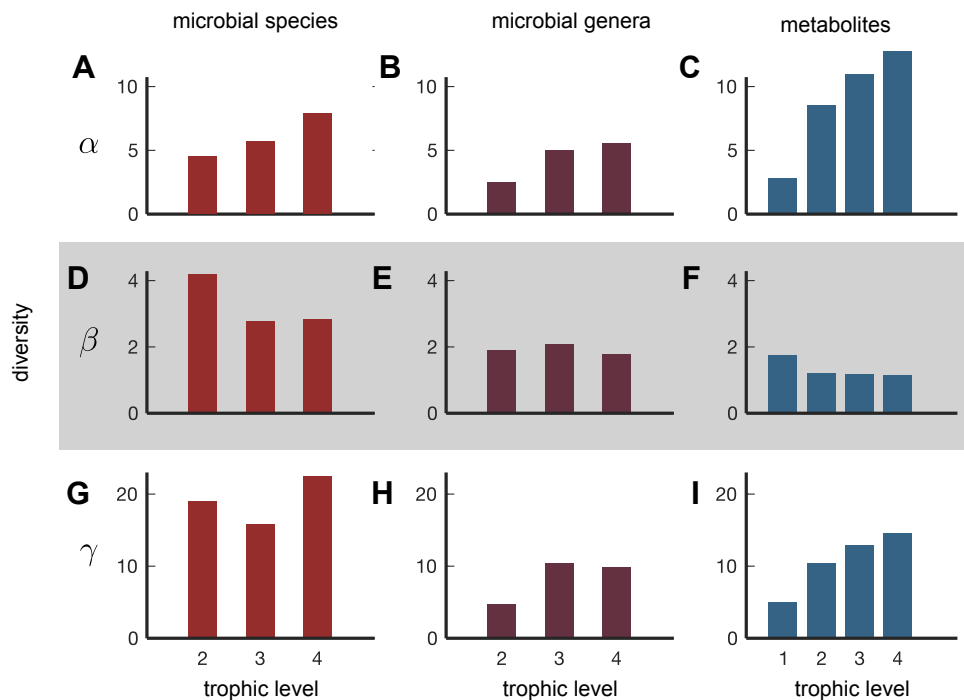

**Figure 4: Metabolite and microbial diversity at different levels.** Effective (A–C)  $\alpha$ -diversity, (D–F)  $\beta$ -diversity, (G–I)  $\gamma$ -diversity in microbial species (A, D, G), microbial genera (B, E, H), and metabolites (C, F, I) plotted as a function of trophic level (1–4) and averaged across 380 individuals.

228 and metabolites. There is no clear trend in the  $\gamma$ -diversity of microbes grouped at the species  
229 level (the “pan-microbiome” diversity, i.e., the number of abundant species in the combined  
230 metagenomes of 380 individuals).

231 Finally the beta-diversity of microbial species, defined as the ratio between  $\gamma$ - and  $\alpha$ -diversity  
232 is the highest ( $\sim 4$ ) in the first level, while being considerably lower ( $\sim 2.5$ ) in the next two  
233 levels. The  $\beta$ -diversity addresses the following important question: how variable are the abundant  
234 species between individuals?

235 While we found that the  $\beta$ -diversity of microbial species could be as large as 4 (figure 4),  
236 when we grouped organisms by their genus,  $\beta$  diversity decreased down to  $\sim 2$  across all levels  
237 (figure 4E). This drop in  $\beta$ -diversity was the most pronounced in the uppermost trophic level.  
238 The overall reduction of  $\beta$ -diversity shown in figure 4E relative to figure 4D suggests that the  
239 chief driver of species variability in the gut microbiome is within-genus competition. Such a  
240 pattern has previously been explained by a “lottery-like” process of microbial competition within  
241 the gut [23].

242 We also quantified the diversity of metabolites across 4 trophic levels. We found that the  $\beta$   
243 diversity of metabolites was the highest in the uppermost level of nutrients ( $\sim 2$ ) and lower in  
244 the next three levels ( $\sim 1$ ). While this declining trend was similar to that observed for microbial  
245 diversity, surprisingly, the value of  $\beta$  diversity for nutrients was much smaller than for microbes  
246 (about 2.5 times lower across all levels). This suggests the picture of functional stability — in  
247 spite of taxonomic variability — in all trophic levels of the human gut microbiome, namely  
248 that even though the species composition of the microbiome can be quite different for different  
249 individuals, their metabolic function is quite similar. These results supplement similar findings of  
250 the HMP project [1] by breaking them up into trophic levels and by using metabolome diversity  
251 instead of metabolic pathways diversity to quantify the extent of functional similarity.



## 252 Discussion

253 Above we introduced and studied a mechanistic, consumer-resource model of the human gut  
254 microbiome quantifying the flow of metabolites and the gradual building up of microbial biomass  
255 across several trophic levels. What distinguishes our model is its ability to simultaneously capture  
256 the metabolic activities of hundreds of species consuming and producing hundreds of metabolites.  
257 Using only the metabolic capabilities — who eats what, and makes what — of different species in  
258 the microbiome, we uncovered roughly four trophic levels in the human gut microbiome. At each  
259 of these levels, some microbes consume nutrients, and convert them partially to their biomass,  
260 while the remainder gets secreted as metabolic byproducts. These metabolic byproducts can  
261 then serve as nutrients for microbes in the next trophic level.

262 Understanding such a trophic organization of microbial ecosystems is important because it  
263 helps identify causal relationships between microbes and metabolites at two consecutive trophic  
264 levels and helps to separate them from purely correlative connections, either at the same or at  
265 more distant levels. Thus it extends the previously introduced concept of a “microbial metabolic  
266 influence network” [6] by highlighting its hierarchical structure in which species/metabolites  
267 assigned to higher trophic levels could affect a large number of species/metabolites located  
268 downstream from them.

269 The concept of trophic levels has been widely used in macro-ecosystems to make sense of flow  
270 of nutrients and energy in large food webs [24, 25, 26], but it has only received limited attention  
271 in microbial ecosystems, one example being ref. [27]. There is no absolute consensus definition  
272 of a trophic level with several interpretations discussed in Refs. [28, 29, 30]. However, all of  
273 these definitions agree with each other on the following two criteria that the trophic structure of  
274 an ecosystem typically satisfies: (1) there is explicit level-to-level conversion and flow of energy  
275 (and biomass), taking place in several discrete steps; and (2) these steps are temporally staged,  
276 because the conversion process at every level takes a finite amount of time. Here we define  
277 a trophic level as a discrete step in the metabolic conversion of nutrients after it enters the  
278 lower gut. Each such step involves multiple microbial species generating byproducts for the  
279 next conversion step. Thus, according to our definition, the same species and metabolite can be  
280 present at more than one trophic level. Furthermore, because of the finite motility in the human  
281 gut, the metabolic activity at each of our trophic levels would tend to be spatially separated  
282 with that in level 1 taking place near the entrance to the lower gut and that in level 4, near the  
283 end of the gut. This definition of trophic levels also results in an imperfect hierarchical structure  
284 of the food web in which some species or metabolites linking non-consecutive trophic levels (see  
285 Ref. [29] for similar processes in macroscopic ecosystems). Also note that spatially separated  
286 microbial compositions, corresponding to the trophic levels in our model, could in principle be  
287 tested in artificial gut systems (such as in Refs. [31, 32]).

288 Further, there are several well-known ecological factors that constrain the number of trophic  
289 levels in an ecosystem, such as ecological energetics and population dynamics (see ref. [28] for a  
290 discussion). Our work introduces additional factors that can limit the number of trophic levels  
291 in the human gut microbiome — namely the limited length and finite motility of the gut.

292 The human gut microbiome is notorious for several complex and interlinked metabolic cross-  
293 feeding interactions between its resident microbial species [6, 33]. Even though we exploit this  
294 aspect of the gut’s microbial ecology to study its trophic organization, we wish to highlight  
295 that we do not confine a metabolite or microbial species to participate strictly at one trophic  
296 level. We can nevertheless tentatively assign metabolites and microbial species to the level to  
297 which they contribute the most. We find that doing so results in trophic level assignments  
298 that are consistent with the expectations of the rest of the gut microbial literature [34]; see

299 figure S6 for a representative example of a trophic network. Specifically, we find that various  
300 polysaccharide-degrading species from the genera *Prevotella* and *Bacteroides* tend to be assigned  
301 to the first microbial layer, leading to the production of acetate [34]. This acetate is, in turn,  
302 the major substrate for butyrate-producing bacteria such as various species of *Eubacterium*  
303 and *Roseburia*, as well as the well-known *Faecalibacterium prausnitzii*; our tentative assignment  
304 procedure places these species in the subsequent layers of the trophic network. The butyrate and  
305 valerate secreted by these species consequently end up, and are assigned to, metabolite trophic  
306 levels 3 and 4. Similarly, various sulfate-reducing species (e.g., *Desulfovibrio piger*, *Bilophila*  
307 *wadsworthia*) and acetogenic bacteria (e.g., *Blautia hansenii*), as well as their byproducts, are  
308 typically assigned to the lower trophic levels by our model. One can also see that, towards the  
309 lower trophic levels metabolites are either very simple and energy-poor, like CO<sub>2</sub>, H<sub>2</sub>, H<sub>2</sub>S, or are  
310 those that cannot be consumed by any gut microbial species, such as various amines, short-chain  
311 fatty acids (SCFAs), and secondary bile acids. We expect these latter set of metabolites to  
312 therefore be present in an individual’s fecal metabolome.

313 By assuming such a fluid multi-level trophic organization, our model is able to independently  
314 predict the fecal metabolome of individual humans, in quantitative agreement with experimental  
315 measurements, comparable to or better than the state of the art. For example, Ref. [12] used  
316 intra-cellular metabolic flux balance analysis (FBA) to achieve a Pearson correlation coefficient  
317 0.4 between the predicted and a representative experimentally measured fecal metabolome. In  
318 contrast, our model achieved the Pearson correlation of 0.68 in individualized predictions using  
319 only two ecologically meaningful parameters. This suggests that incorporating ecological infor-  
320 mation about the human gut microbiome can generate mechanistically-grounded and internally  
321 consistent fecal metabolome predictions given information about an individual’s metagenome  
322 (species abundance profile).

323 Our model also allows us to quantify the diversity of both species and metabolites contributing  
324 to different trophic levels. One conclusion we made was that the functional convergence of the  
325 microbiome holds roughly equally across all trophic levels. Indeed, at each level we observed  
326 the microbial diversity across different individuals was considerably higher than their metabolic  
327 diversity. Our model also provides additional support to the “lottery” scenario described in Ref.  
328 [23], especially in the first trophic level. According to this scenario, there are multiple species  
329 nearly equally capable of occupying a certain ecological niche, which in our model corresponds  
330 to the set of nutrients they consume and secrete as byproducts. The first species to occupy this  
331 niche prevents equivalent microbes from entering it. This is reflected in a high  $\beta$ -diversity of  
332 microbial species combined with a low to moderate  $\beta$ -diversity of microbial genera to which they  
333 belong and low  $\beta$ -diversity of their metabolic byproducts.

334 Our model is focused on studying the effects of cross-feeding and competition of different  
335 microbes for their nutrients. Thereby it ignores a number of important factors known to impact  
336 the composition of the human gut microbiome. These include interactions with host and its  
337 immune system [35] as well as with viruses [36], and environmental parameters other than  
338 nutrients, such as pH [14], spatial organization [37], etc. Instead, our model uses only two  
339 adjustable parameters: the byproduct fraction  $f$  and the number of trophic levels  $N_\ell$ , assumed  
340 to be common to all species. This very small number of parameters has been a conscious choice  
341 on our part. We are perfectly aware that species differ from each other in their byproduct ratios,  
342 and that the metabolic flows are not equally split among multiple byproducts. This can be  
343 easily captured by a variant of our model in which different nutrient inputs and and byproduct  
344 outputs of a given microbial species are characterized by different kinetic rates. However, this  
345 would immediately increase the number of parameters from 2 to more than 3,600. To calibrate a  
346 model with such a huge number of parameters one needs many more experimental data than

347 we have access to right now. However, we tested the sensitivity of our model to variation in  
348 these parameters by repeating our simulations for 100 random sets of nutrient kinetic uptake  
349 and byproduct release rates ( $\lambda$ 's in our model), and found that this did not qualitatively change  
350 our central result (i.e., that the human gut microbiome is composed of roughly  $N_\ell = 4$  trophic  
351 levels with a byproduct fraction  $f = 0.9$ ). Surprisingly, our metabolome predictions were also  
352 relatively insensitive with respect to varying these parameters (Figure S1). The exact nature  
353 of the robustness of these metabolome predictions is beyond the scope of this paper, and the  
354 subject of future work.

## 355 **Methods**

### 356 **Obtaining data for microbial metabolic capabilities**

357 For information about the metabolic capabilities of human gut microbes, we adopted a recently  
358 published manually-curated database, NJS16, which includes such data for 570 common gut  
359 microbial species and 244 relevant metabolites from Ref. [6]. This database recorded, for each  
360 microbial species, which metabolites each of the species could consume, and which they secreted  
361 as byproducts. Since we were interested in those metabolites that could be used for microbial  
362 growth, we removed metabolites such as ions (e.g.,  $\text{Na}^+$ ,  $\text{Ca}^+$ ) from NJS16. Moreover, we  
363 constrained our analyses to microbes only, and therefore removed the 3 types of human cells from  
364 NJS16. This left us with a database with 567 microbes, 235 metabolites and 4,248 interactions  
365 connecting these microbes with corresponding metabolites (see table S1 for the complete table of  
366 interactions).

### 367 **Obtaining metagenomic and metabolomic data**

368 To calibrate the key parameters of our model, we used a previously published dataset, namely a  
369 16S rRNA sequencing study of 41 human individuals from rural and urban areas in Thailand  
370 [22]. From these data, we collected the reported 16S rRNA OTU abundances as well as their  
371 corresponding taxonomy. We explicitly removed all OTUs that did not have an assigned species-  
372 level taxonomy. The remaining OTUs explained roughly 71% ( $\pm 15\%$ ) of the bacterial abundances  
373 per sample.

374 We then mapped these species names to those listed in the NJS16 database. We found an  
375 exact match for 110 species out of 208 in this table. In order to improve the species coverage from  
376 the abundance data, we manually mapped the remaining species in the following manner. For  
377 those genera in NJS16, whose member species had identical metabolic capabilities, we assumed  
378 that the capabilities of other, unmapped species from these genera were the same as these species.  
379 For several well-studied bacterial genera, such as *Bacteroides*, we determined a “core” set of  
380 metabolic capabilities (i.e., those metabolites that could either be consumed or secreted by all  
381 species in that genus), and assigned them to all unmapped species in that genus (i.e., those with  
382 known abundances, but otherwise understudied metabolic capabilities in NJS16). This allowed  
383 us to map an additional 20 microbial species from the abundance data, and incorporate into our  
384 model. Note that we did this additional mapping, only for those genera, where species metabolic  
385 capabilities were identical.

386 To quantify the metabolome levels in each individual, we used the available quantitative  
387 metabolome profiles (obtained via from CE-TOF MS) corresponding to the 41 individuals whose  
388 metagenomic samples we had. Here, we mapped the reported metabolites to our database of  
389 metabolic capabilities using KEGG identifiers, which revealed 84 such measured metabolites.

390 To make predictions about metabolic flow and effective diversity from our model, we used  
391 additional metagenomic datasets, namely those from the Human Microbiome Project (HMP) [1]  
392 and MetaHIT [2, 21], for which we had microbial abundances, but no fecal metabolome. This  
393 resulted in an additional 380 human individuals, for which we obtained tables of MetaPhlan2  
394 microbial abundances, and mapped species names to those in NJS16 using the same procedure  
395 described above. Here, out of a total of 532 microbial species detected over these data, we could  
396 map and incorporate 316 species. Of these, 207 were mapped through an exact taxonomic match,  
397 and 109 by a genus-capability match. These incorporated species covered, on average, 90% of  
398 the total microbial abundance in each individual sample.

### 399 **Determining the components of the nutrient intake to the gut**

400 The inputs of our model are the experimentally measured relative abundances of microbial  
401 species in each individual, which are known (and described above), and the levels of various  
402 nutrients reaching their lower gut, which we fit using the model. Note that we always used  
403 the experimentally measured relative microbial abundances, which simplified calculations and  
404 made the model easy to run. This also removed the model's dependence on the initial relative  
405 abundances, and the need for a new set of parameters to represent them. Moreover, this  
406 assumption is valid and self-consistent; our model's calculated abundances are very close to the  
407 experimentally observed abundances (see figure 2B). This is discussed in greater detail in the  
408 next section. For simplicity, we did not explicitly include the various polysaccharides (dietary  
409 fibers, starch, etc.) known to constitute the bulk of an individual's diet. Instead, we chose not to  
410 include the polysaccharides themselves, but instead use their breakdown products as the direct  
411 nutrient intake to the gut. The reason for this is our limited quantitative understanding of the  
412 processes by which these polysaccharides are converted to these breakdown products, e.g., the  
413 levels of extracellular enzymes, variability in their composition (their lability), etc. This curated  
414 nutrient intake consisted of 19 metabolites, such as arabinose, raffinose, and xylose (see table S2  
415 for the complete list of metabolites).

### 416 **Constructing and validating the trophic model**

417 Our model incorporates a set of observed microbial species abundances and the known metabolic  
418 cross-feeding interactions between these species, to calculate and predict both the step-wise  
419 metabolic flow through the lower gut, and the resulting fecal metabolome. The model does this  
420 on an individual-to-individual basis. We started simulating the model with the various levels of  
421 nutrients entering the lower gut, represented by the 19-dimensional vector  $\vec{c}_{nut}$ . Each element of  
422  $\vec{c}_{nut}$ , say  $c_{nut,i}$  represents the amount of one of the 19 metabolites entering the lower gut of that  
423 individual. We inferred these amounts through a fitting procedure described in the next section.  
424 Throughout this description, we use the subscript  $i$  to refer to metabolites, and  $\alpha$  to refer to  
425 microbial species.

426 In the first trophic level, we calculated how these nutrients entering the gut were consumed  
427 by the gut microbiome and converted to microbial biomass,  $\vec{B}$  and metabolic byproducts,  $\vec{c}_{layer}$ .  
428 For this, we calculated the relative increase in microbial biomass for each species,  $\alpha$ , as follows:

$$B_{\alpha} = (1 - f) \cdot A_{in} \cdot \vec{c}_{nut}, \quad (1)$$

429 where  $(1 - f)$  represents the fraction of consumed metabolites converted to biomass, and  $f$   
430 represents the fraction of input nutrients converted to metabolic byproducts.  $A_{in}$  is a matrix  
431 which represents how each species takes up and consumes the nutrients it is capable of. Each

432 term of this matrix,  $(A_{in})_{\alpha,i}$  was set to zero if species  $\alpha$  was incapable of consuming metabolite  
433  $i$  as a nutrient (using the set of microbial metabolic capabilities in table S1). If species  $\alpha$  was  
434 instead capable of consuming metabolite  $i$  as a nutrient, then  $(A_{in})_{\alpha,i}$  was set as follows:

$$(A_{in})_{\alpha,i} = \kappa_i \lambda_{\alpha,i} B_{\alpha}^{\text{exp}}. \quad (2)$$

435 Here,  $\lambda_{\alpha,i}$  represents the rate at which species  $\alpha$  takes up nutrient  $i$ ,  $B_{\alpha}^{\text{exp}}$  is the experimentally  
436 measured abundance of strain  $\alpha$ , and  $\kappa_i$  is a constant to normalize the relative microbial  
437 abundances of species capable of consuming nutrient  $i$  to one. Throughout the manuscript, we  
438 set  $\lambda_{\alpha,i} = 1$  for all values of  $\alpha$  and  $i$ ; this is because we lacked knowledge of the precise rates  
439 at which each species takes up different nutrients, and had insufficient data about microbial  
440 growth to fit them using our model. To verify that this assumption did not significantly affect  
441 the predictions of our model, we repeated our metabolome predictions 100 times by assigning  
442 each value of  $\lambda_{\alpha,i}$  randomly, chosen from a uniform distribution between 0 and 1 (see figure S1).

443 After calculating the contribution of nutrient consumption to microbial biomass, we computed  
444 the relative levels of the first level of metabolic byproducts produced by them, as follows:

$$c_{1,i} = f A_{out} A_{in} \cdot \vec{c}_{nut}, \quad (3)$$

445 where the 1 indicates that we were calculating the first layer of byproducts, and  $i$ , each metabolite  
446 which could be secreted as a byproduct.  $A_{out}$  is matrix which represents which byproduct each  
447 species could secrete, and in what amount. Each term of this matrix  $(A_{out})_{i,\alpha}$  was set to zero  
448 if species  $\alpha$  could not secrete metabolite  $i$  as a byproduct (using the interactions in NJS16  
449 described previously; see table S1). If species  $\alpha$  was instead capable of secreting metabolite  $i$  as  
450 a byproduct, then  $(A_{out})_{i,\alpha}$  was set as follows:

$$(A_{out})_{i,\alpha} = \frac{1}{(\mathcal{N}_{out})_{\alpha}}, \quad (4)$$

451 where  $(\mathcal{N}_{out})_{\alpha}$  is the number of byproducts that species  $\alpha$  was capable of secreting.

452 In the second trophic level (and all subsequent levels), we calculated how the byproducts  
453 secreted by the microbes in the previous step were consumed by the gut microbiome and  
454 converted to further biomass and byproducts. After  $N_{\ell}$  such steps, we calculated the final  
455 microbial abundances,  $\vec{B}$ , and the accumulated metabolic byproducts,  $\vec{c}_{\text{metabolome}}$ . We would later  
456 compare these with the individual's experimentally measured metagenome and fecal metabolome,  
457 respectively. The final microbial abundances,  $\vec{B}$ , were calculated as follows:

$$B_{\alpha} = \sum_{\ell=1}^{N_{\ell}} (1-f)^{\ell} \cdot f^{\ell-1} \cdot A_{in} \cdot (A_{out} A_{in})^{\ell-1} \cdot \vec{c}_{nut}. \quad (5)$$

458 Here, we chose the appropriate number of trophic levels,  $N_{\ell}$  and the byproduct fraction,  $f$ , by  
459 comparing the model's predicted fecal metabolome with the individual's experimentally measured  
460 metabolome. The number of levels and byproduct fraction that best matched the experimentally  
461 observed metabolomes, averaged over all individuals, were the ones that were considered to best  
462 represent their gut microbiome. To measure the best match, we used two different measures:  
463 (1) the Pearson correlation coefficient between the predicted and experimentally measured  
464 fecal metabolomes (see figure 2A), and (2) a logarithmic accuracy, i.e., the average difference  
465 between the log-transformed predicted and observed metabolome levels (see figure S2), i.e.,  
466  $\frac{1}{19} \sum_{i=1}^{19} |\log_{10}(p_i) - \log_{10}(m_i)|$ , where  $m_i$  is the experimentally measured metabolome level of  
467 metabolite  $i$ , and  $p_i$  is the predicted metabolome level of metabolite  $i$ , calculated by summing



468 up the levels of all unused metabolites. Specifically, at each level, we calculated the byproducts  
469 similar to the first level (see equation (3)), as follows:

$$\vec{c}_\ell = f^\ell(A_{out}A_{in})^{\ell-1} \cdot \vec{c}_{nut}. \quad (6)$$

470 We split the byproducts at each level,  $\vec{c}_\ell$ , into two parts: a consumable part,  $\vec{c}_\ell^{\text{con}}$  and an  
471 unconsumable part,  $\vec{c}_\ell^{\text{uncon}}$ . While the consumable part of the byproducts was available to the  
472 next trophic level of microbial species, the unconsumable part was composed of all the byproducts  
473 which could not be consumed by any microbial species in the individual's gut microbiome (i.e.,  
474 it satisfied  $A_{in}\vec{c}_\ell^{\text{uncon}} = \vec{0}$ ). The former, consumable part was obtained by subtracting the  
475 unconsumable part from the generated byproducts at each level, i.e.,  $\vec{c}_\ell^{\text{con}} = \vec{c}_\ell - \vec{c}_\ell^{\text{uncon}}$ . Finally,  
476 we calculated the predicted metabolome,  $\vec{M}$ , by adding up the unconsumable byproducts from  
477 all previous levels with all the byproducts from the final trophic level, as follows:

$$\vec{M} = \vec{c}_{N_\ell} + \sum_{\ell=1}^{N_\ell-1} \vec{c}_\ell^{\text{uncon}}. \quad (7)$$

478 Note that while the Pearson correlation (and its associated  $P$ -value) give an indication of the  
479 similarity in the trends predicted by our model with the experimentally observed metabolome,  
480 the logarithmic accuracy actually calculates the average error (measured in orders of magnitude)  
481 between the predicted and experimentally observed metabolomes. In both cases, we used the  
482 log-transformed values because we were interested in comparing the quality of our predictions  
483 with the experimental measurements at the level of resolution of an order of magnitude. This  
484 avoided overfitting in the model. Moreover, note that the nutrient input to the model (which  
485 we fit; see next section) resulted in a predicted set of microbial abundances,  $\vec{B}$  (obtained from  
486 equation (5)) that were very close to the experimentally observed abundances. This allowed us  
487 to simplify our calculation; we used the experimentally measured microbial abundances instead  
488 of a more complicated, step-wise calculation in the sum of equation (5).

489 For each metabolome correlation coefficient that we calculated, we also corrected its associated  
490  $P$ -value, in order to account for the two adjustable parameters in our model. We did this by  
491 adjusting (1)  $t$ -statistic: the adjusted  $t$ -statistic is obtained by dividing the original  $t$ -statistic  
492 by  $\sqrt{\frac{n-2-p}{n-2}}$ , where  $n$  was the number of metabolites (or points) that were used to measure the  
493 correlation, and  $p$  was the number of adjustable model parameters (in our case,  $p = 2$ ); (2)  $t$ -test:  
494 typically the one-tailed  $t$ -test with degree of freedom  $n - 2$  is used to compute of  $P$ -value for the  
495 Pearson correlation coefficient. Here the one-tailed  $t$ -test with degree of freedom  $n - 2 - p$  is  
496 used to account for adjustable model parameters.

## 497 Fitting and inferring the nutrient intake to the gut

498 Simulating the model required us to know the nutrient intake to the gut, for which there are  
499 no available experimental measurements. Therefore, we inferred the amounts of these 19 intake  
500 metabolites by fitting the microbial abundances predicted by our model with those measured from  
501 each individual's microbiome. We used a nonlinear optimization technique for this (implemented  
502 as `lsqnonlin` in MATLAB R2018a, Mathworks Inc.). We initially chose a random set of nutrient  
503 inputs, each chosen randomly from a uniform distribution between 0 and 1, and normalized so  
504 that all nutrient inputs summed up to one. For this random set of nutrient inputs, we calculated  
505 the predicted microbial abundances using equation (5). We then calculated the error in this  
506 prediction, by using the log-transformed differences between the predicted and experimentally



507 measured microbial abundances, i.e.,  $\frac{1}{S} \sum_{\alpha=1}^S |\log_{10}(p_{\alpha}) - \log_{10}(m_{\alpha})|$ , where  $S$  is the number  
508 of microbial species with non-zero abundances in the individual,  $p_{\alpha}$  is the predicted relative  
509 abundance of species  $\alpha$ , and  $m_{\alpha}$  is the experimentally measured abundance of species  $\alpha$ . We  
510 then let the nonlinear optimization routine vary and choose that set of nutrient inputs, which  
511 minimized this error. We assumed that this set of nutrient inputs, which best explained the  
512 observed microbial abundances, given the microbial cross-feeding interactions, as the nutrient  
513 intake to the lower gut, or first trophic level, of that individual. Note that this is only step where  
514 we perform fitting in the model. All other subsequent steps, especially the prediction of the  
515 fecal metabolome, is an independent prediction from the model. Typically, we fit 19 metabolite  
516 amounts for each human individual, who had roughly 80 microbial species.

### 517 **Shuffling microbial metabolic capabilities to test model predictions**

518 To test how good our model's gut metagenome and fecal metabolome predictions were against  
519 a null, or random, expectation, we repeated our simulations using a randomly shuffled set of  
520 microbial metabolic capabilities. For each individual microbial species, we picked one metabolite  
521 that they either could consume randomly, and swapped it with a metabolite that could be  
522 consumed by another microbial species. We also did this separately and independently with  
523 metabolites that they could secrete. Such swaps ensured that each microbial species could still  
524 consume and secrete the same number of metabolites as in the original dataset, but shuffled all  
525 the ecologically relevant metabolic relationships between species and metabolites. The swapping  
526 is performed three times as many the number of edges in the network to guarantee enough  
527 randomness. At the end of several rounds of swapping such relationships, we repeated our model's  
528 simulations exactly as described above, except with this shuffled set of microbial metabolic  
529 capabilities.

### 530 **Calculating level-by-level diversity**

To quantify the diversity of microbes and metabolites at each trophic level across the 380  
individuals we studied, we used three measures popular in the ecosystems literature: namely  
the  $\alpha$ -,  $\beta$ - and  $\gamma$ - diversity [38, 39, 40]. For each individual, we calculated the  $\alpha$ -diversity of  
microbes and metabolites on each of the trophic levels. For this we first quantified the relative  
contributions of a given level to microbial abundances, and separately to the fecal metabolome  
profile. The contribution of a given trophic level  $\ell$  to the relative abundance of a species  
(microbial or, separately, metabolic)  $i$  in a specific individual  $j$  is given by  $p_i(\ell, j)$  normalized by  
 $\sum_{i=1}^S p_i(\ell, j) = 1$ . The  $\alpha$ -diversity

$$D_{\alpha}(\ell) = \frac{1}{\langle \sum_{i=1}^S p_i(\ell, j)^2 \rangle_j},$$

531 where  $\langle \cdot \rangle_j$  represents taking the average across 380 individuals used in our analysis.

532 Across all individuals, we calculated the  $\gamma$ -diversity of microbes and metabolites in their gut,  
533 which quantified the "global" diversity across all individuals, as:

$$D_{\gamma}(\ell) = \frac{1}{\sum_{i=1}^S p_i(\ell)^2},$$

534 where  $p_i(\ell) = \langle p_i(\ell, j) \rangle_j$  is the mean relative abundance of species (or metabolite)  $i$  at the trophic  
535 level  $\ell$  across all individuals used in our analysis.

536 Finally, to quantify the between-individual variability in microbial and metabolite diversity,  
537 we calculated the overall  $\beta$ -diversity, which is the ratio of the global to local diversity, as:

$$D_{\beta}(\ell) = \frac{D_{\gamma}(\ell)}{D_{\alpha}(\ell)}.$$

### 538 Code availability

539 All computer code and extracted data files used in this study are available at the following URL:  
540 [https://github.com/eltanin4/trophic\\_gut](https://github.com/eltanin4/trophic_gut).

## 541 Supplementary Figures and Tables

542 **Figure S1 Effect of changing kinetic parameters on model prediction.** Scatter plot  
543 of the measured and predicted metabolome where, instead of considering equal specific nutrient  
544 uptake and byproduct release rates,  $\lambda$ 's in our model, we take several random sets (in black).  
545 Error bars (in black) indicate standard deviation in the predicted levels of specific metabolites  
546 for different sets of  $\lambda$ 's. The solid line represents  $x = y$ . Red squares indicate the predicted  
547 metabolome for the default set of kinetic parameters used, i.e., when all of  $\lambda$ 's were set equal to  
548 1.

549 **Table S1 Microbial and metabolite interactions used in the model.** Table of all 4,248  
550 interactions between microbes and metabolites used in the model, from Ref. [6].

551 **Table S2 Components of the nutrient intake to the gut.** List of all 19 metabolites used  
552 to fit the gut nutrient intake in the model.

553 **Table S3 Metabolome predictions of the model for 380 individuals from the Human  
554 Microbiome Project (HMP) and the MetaHIT study.** All metabolites in metabolome  
555 predicted by the model with global parameters  $f = 0.9$  and  $N_{\ell} = 4$  for all 380 individuals are  
556 listed.

## 557 Acknowledgments

558 A.G. acknowledges support from the Simons Foundation and the American Physical Society. We  
559 thank Parth Pratim Pandey for useful discussions.

## 560 Conflicts of interest

561 The authors declare that there are no competing interests.

## References

- [1] Consortium HMP, et al. Structure, function and diversity of the healthy human microbiome. *Nature*. 2012;486(7402):207–214.

- [2] Qin J, Li R, Raes J, Arumugam M, Burgdorf KS, Manichanh C, et al. A human gut microbial gene catalogue established by metagenomic sequencing. *nature*. 2010;464(7285):59–65.
- [3] Magnúsdóttir S, Heinken A, Kutt L, Ravcheev DA, Bauer E, Noronha A, et al. Generation of genome-scale metabolic reconstructions for 773 members of the human gut microbiota. *Nature biotechnology*. 2017;35(1):81.
- [4] San Roman M, Wagner A. An enormous potential for niche construction through bacterial cross-feeding in a homogeneous environment. *PLoS computational biology*. 2018;14(7):e1006340.
- [5] Pacheco AR, Moel M, Segre D. Costless metabolic secretions as drivers of interspecies interactions in microbial ecosystems. *Nature communications*. 2019;10(1):103.
- [6] Sung J, Kim S, Cabatbat JJT, Jang S, Jin YS, Jung GY, et al. Global metabolic interaction network of the human gut microbiota for context-specific community-scale analysis. *Nature communications*. 2017;8:15393.
- [7] Goyal A. Metabolic adaptations underlying genome flexibility in prokaryotes. *PLoS genetics*. 2018;14(10):e1007763.
- [8] Ponomarova O, Patil KR. Metabolic interactions in microbial communities: untangling the Gordian knot. *Current opinion in microbiology*. 2015;27:37–44.
- [9] Muller EE, Faust K, Widder S, Herold M, Arbas SM, Wilmes P. Using metabolic networks to resolve ecological properties of microbiomes. *Current Opinion in Systems Biology*. 2018;8:73–80.
- [10] Bauer E, Thiele I. From network analysis to functional metabolic modeling of the human gut microbiota. *MSystems*. 2018;3(3):e00209–17.
- [11] Magnúsdóttir S, Thiele I. Modeling metabolism of the human gut microbiome. *Current opinion in biotechnology*. 2018;51:90–96.
- [12] Garza DR, Verk MC, Huynen MA, Dutilh BE. Towards predicting the environmental metabolome from metagenomics with a mechanistic model. *Nature microbiology*. 2018; p. 1.
- [13] Cremer J, Segota I, Yang Cy, Arnoldini M, Sauls JT, Zhang Z, et al. Effect of flow and peristaltic mixing on bacterial growth in a gut-like channel. *Proceedings of the National Academy of Sciences*. 2016;113(41):11414–11419.
- [14] Cremer J, Arnoldini M, Hwa T. Effect of water flow and chemical environment on microbiota growth and composition in the human colon. *Proceedings of the National Academy of Sciences*. 2017;114(25):6438–6443.
- [15] Varma A, Palsson BO. Stoichiometric flux balance models quantitatively predict growth and metabolic by-product secretion in wild-type *Escherichia coli* W3110. *Appl Environ Microbiol*. 1994;60(10):3724–3731.
- [16] Waltman P, Hubbell SP, Hsu SB. Theoretical and experimental investigations of microbial competition in continuous culture. In: *Modeling and differential equations in biology*. Routledge; 2017. p. 107–152.

- [17] Goldford JE, Lu N, Bajić D, Estrela S, Tikhonov M, Sanchez-Gorostiaga A, et al. Emergent simplicity in microbial community assembly. *Science*. 2018;361(6401):469–474.
- [18] Ratzke C, Gore J. Modifying and reacting to the environmental pH can drive bacterial interactions. *PLoS biology*. 2018;16(3):e2004248.
- [19] Kettle H, Louis P, Holtrop G, Duncan SH, Flint HJ. Modelling the emergent dynamics and major metabolites of the human colonic microbiota. *Environmental microbiology*. 2015;17(5):1615–1630.
- [20] Louca S, Doebeli M. Reaction-centric modeling of microbial ecosystems. *Ecological modelling*. 2016;335:74–86.
- [21] Qin J, Li Y, Cai Z, Li S, Zhu J, Zhang F, et al. A metagenome-wide association study of gut microbiota in type 2 diabetes. *Nature*. 2012;490(7418):55.
- [22] Kisuse J, La-ongkham O, Nakphaichit M, Therdtatha P, Momoda R, Tanaka M, et al. Urban diets linked to gut microbiome and metabolome alterations in children: A comparative cross-sectional study in Thailand. *Frontiers in microbiology*. 2018;9.
- [23] Verster AJ, Borenstein E. Competitive lottery-based assembly of selected clades in the human gut microbiome. *Microbiome*. 2018;6(1):186.
- [24] Voigt W, Perner J, Davis AJ, Eggers T, Schumacher J, Bährmann R, et al. Trophic levels are differentially sensitive to climate. *Ecology*. 2003;84(9):2444–2453.
- [25] Pace ML, Cole JJ, Carpenter SR, Kitchell JF. Trophic cascades revealed in diverse ecosystems. *Trends in ecology & evolution*. 1999;14(12):483–488.
- [26] Williams RJ, Martinez ND. Limits to trophic levels and omnivory in complex food webs: theory and data. *The American Naturalist*. 2004;163(3):458–468.
- [27] Solden LM, Naas AE, Roux S, Daly RA, Collins WB, Nicora CD, et al. Interspecies cross-feeding orchestrates carbon degradation in the rumen ecosystem. *Nature Microbiology*. 2018;3(11):1274.
- [28] Pimm S, Lawton J. Number of trophic levels in ecological communities. *Nature*. 1977;268(5618):329.
- [29] Burns TP. Lindeman’s contradiction and the trophic structure of ecosystems. *Ecology*. 1989;70(5):1355–1362.
- [30] Kozlovsky DG. A critical evaluation of the trophic level concept. I. Ecological efficiencies. *Ecology*. 1968;49(1):48–60.
- [31] Van de Wiele T, Van den Abbeele P, Ossieur W, Possemiers S, Marzorati M. The simulator of the human intestinal microbial ecosystem (SHIME®). In: *The impact of food bioactives on health*. Springer, Cham; 2015. p. 305–317.
- [32] Barroso E, Cueva C, Peláez C, Martínez-Cuesta MC, Requena T. Development of human colonic microbiota in the computer-controlled dynamic SIMulator of the GastroIntestinal tract SIMGI. *LWT-Food Science and Technology*. 2015;61(2):283–289.

- [33] Blaut M. Ecology and physiology of the intestinal tract. In: *Between Pathogenicity and Commensalism*. Springer; 2011. p. 247–272.
- [34] Louis P, Hold GL, Flint HJ. The gut microbiota, bacterial metabolites and colorectal cancer. *Nature reviews microbiology*. 2014;12(10):661.
- [35] Nicholson JK, Holmes E, Kinross J, Burcelin R, Gibson G, Jia W, et al. Host-gut microbiota metabolic interactions. *Science*. 2012;336(6086):1262–1267.
- [36] Manrique P, Bolduc B, Walk ST, van der Oost J, de Vos WM, Young MJ. Healthy human gut phageome. *Proceedings of the National Academy of Sciences*. 2016;113(37):10400–10405.
- [37] Tropini C, Earle KA, Huang KC, Sonnenburg JL. The gut microbiome: connecting spatial organization to function. *Cell host & microbe*. 2017;21(4):433–442.
- [38] Whittaker RH. Evolution and measurement of species diversity. *Taxon*. 1972; p. 213–251.
- [39] Tuomisto H. A diversity of beta diversities: straightening up a concept gone awry. Part 1. Defining beta diversity as a function of alpha and gamma diversity. *Ecography*. 2010;33(1):2–22.
- [40] Tuomisto H. A consistent terminology for quantifying species diversity? Yes, it does exist. *Oecologia*. 2010;164(4):853–860.

## Supplementary Figures

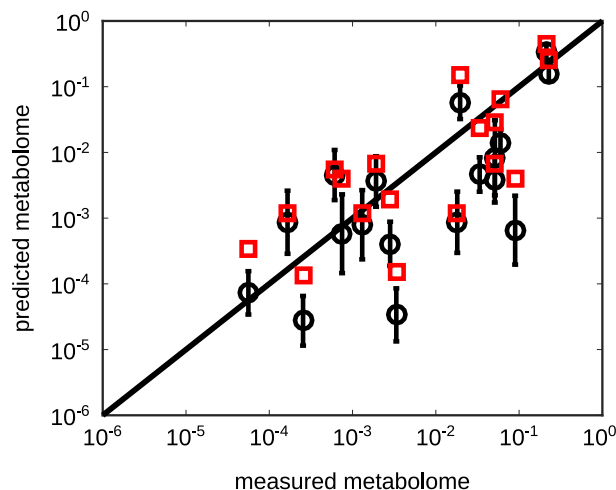

**Figure S1: Effect of changing kinetic parameters on model prediction.** Scatter plot of the measured and predicted metabolome where, instead of considering equal specific nutrient uptake and byproduct release rates,  $\lambda$ 's in our model, we take several random sets (in black). Error bars (in black) indicate standard deviation in the predicted levels of specific metabolites for different sets of  $\lambda$ 's. The solid line represents  $x = y$ . Red squares indicate the predicted metabolome for the default set of kinetic parameters used, i.e., when all of  $\lambda$ 's were set equal to 1.



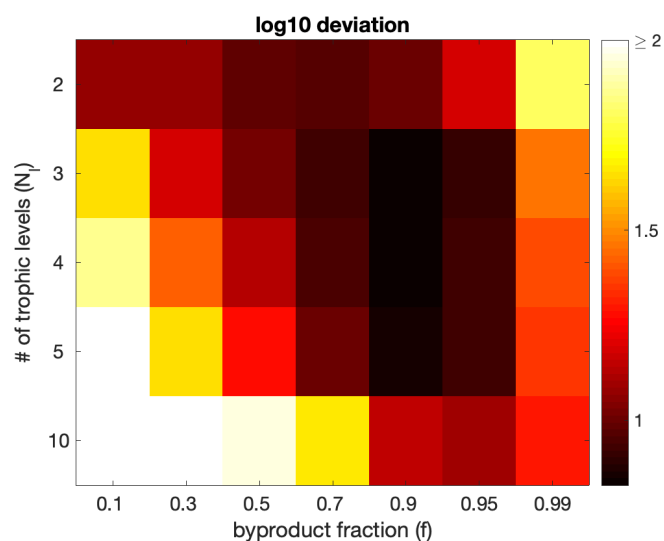

**Figure S2: Calibrating the model parameters using logarithmic accuracy.** Heatmap of the logarithmic accuracy between experimentally measured and predicted fecal metabolomes for different combinations of parameters  $f$  and  $N_\ell$ . The logarithmic accuracy quantifies the average order-of-magnitude error in our predicted fecal metabolome, when compared with the experimentally measured one (see Methods for details). The plotted value is the logarithmic accuracy averaged over 41 individuals in Ref. [22]

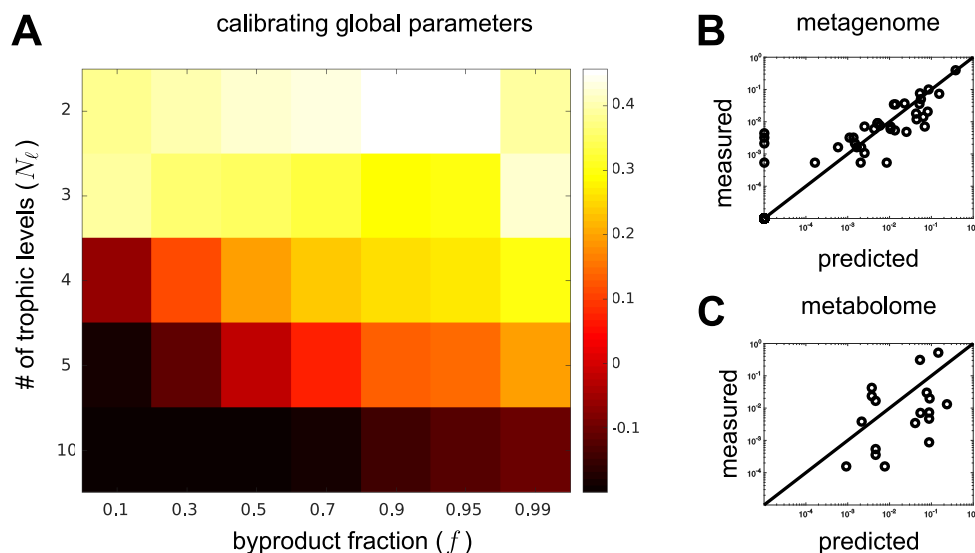

**Figure S3: Results for model calibration after shuffling microbial metabolic capabilities.** Same as figure 2 from the main text, except that the simulations have been performed after shuffling the set of microbial metabolic capabilities, to test the dependence of our predictions on metabolic interactions (see Methods for details). (A) Heatmap of the Pearson correlation between experimentally measured and predicted metabolomes for different combinations of parameters  $f$  and  $N_\ell$ . The plotted value is the correlation coefficient averaged over 41 individuals in Ref. [22]. For this shuffled network, the best average Pearson correlation coefficient 0.44 is given by  $f = 0.9$  and  $N_\ell = 2$ . Panel (B) and (C) are generated by those global parameters. (B) Comparison between the experimentally observed bacterial abundances in a representative individual (y-axis) and their best fits from our model (x-axis) with  $f = 0.9$  and  $N_\ell = 2$ . (C) Comparison between the experimentally observed fecal metabolome (y-axis) and the predictions of our model (x-axis) with  $f = 0.9$  and  $N_\ell = 2$  in the same individual shown in panel (B) (Pearson correlation 0.32;  $P$ -value 0.19).

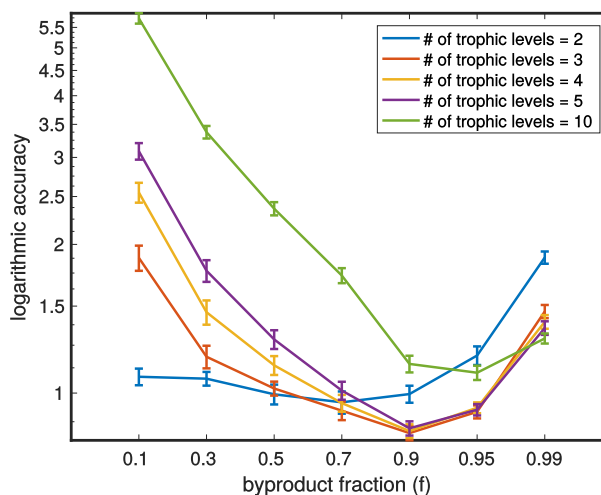

**Figure S4: Testing model predictions for byproduct fractions beyond 0.9** Logarithmic accuracy of the model's predictions between the metabolomes (see Methods for details) for byproduct fraction,  $f$ , values 0.95 and 0.99. Higher values on the y-axis means worse predictions. This suggests that at 4 trophic levels,  $f = 0.9$  gives the best calibration.

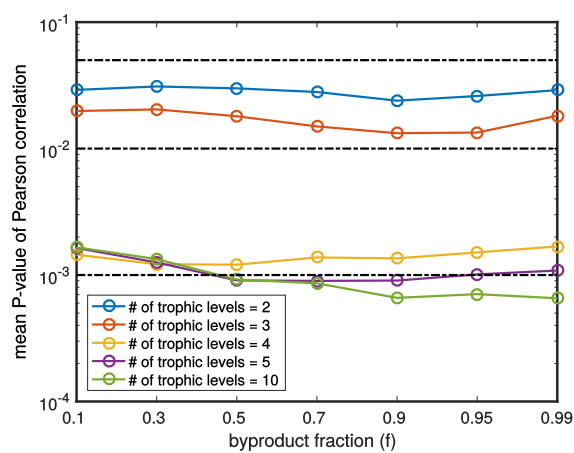

**Figure S5: Adjusted  $P$ -values for the model predictions** Blue nodes correspond to metabolites, red nodes to the microbes. Blue edges show metabolite consumption, red - production.

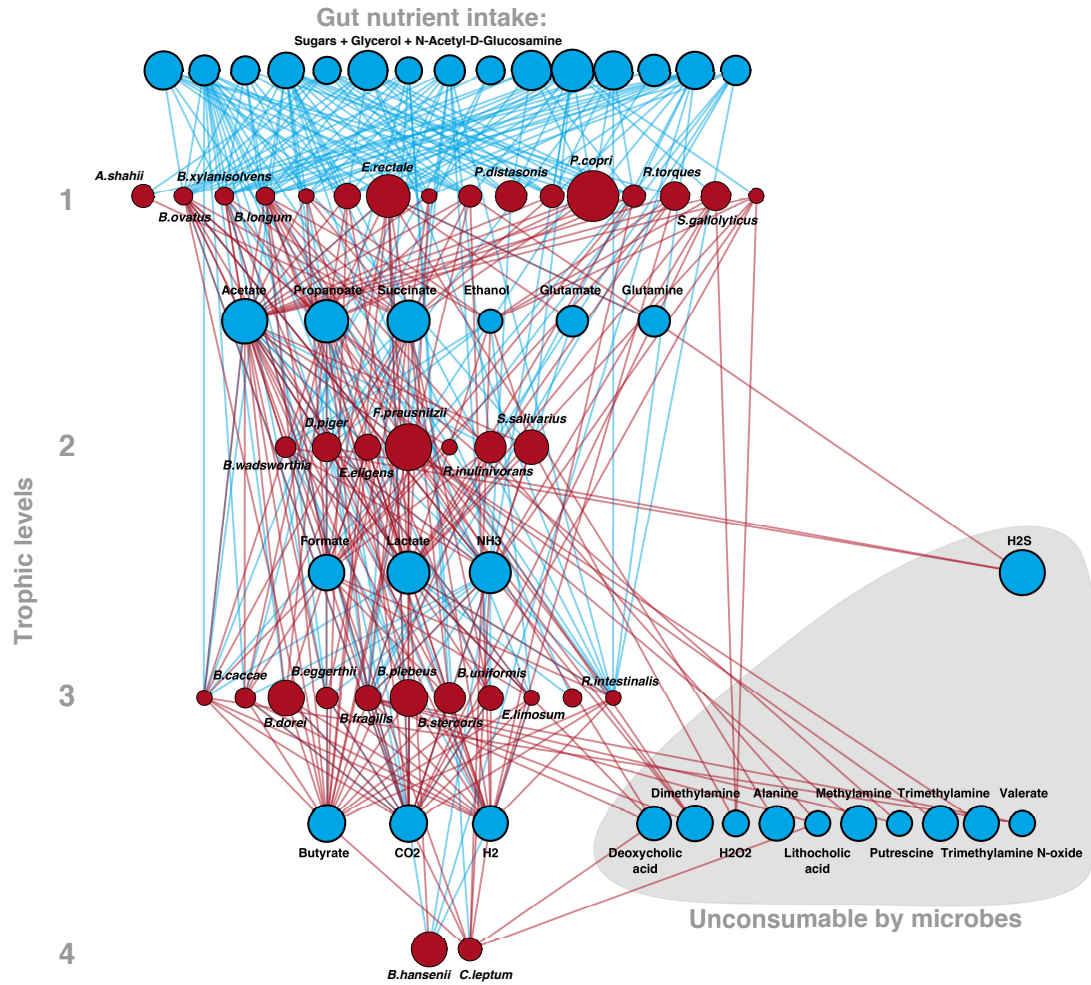

**Figure S6: Layer-wise network for one of the individuals from the calibrated dataset.** Blue nodes correspond to metabolites, red nodes to the microbes as in figure 1B. Blue edges show metabolite consumption, red - production.
